# Supplementary material for: A dual-salt coupled fluoroethylene carbonate succinonitrile-based electrolyte enables Li-metal batteries
Source: Royal Society of Chemistry journal article supplement (doi:10.1039/c9ta11341j), 2019-12-25
Supplement: c9ta11341j1.pdf [file c9ta11341j1.pdf]

Supporting Figures.

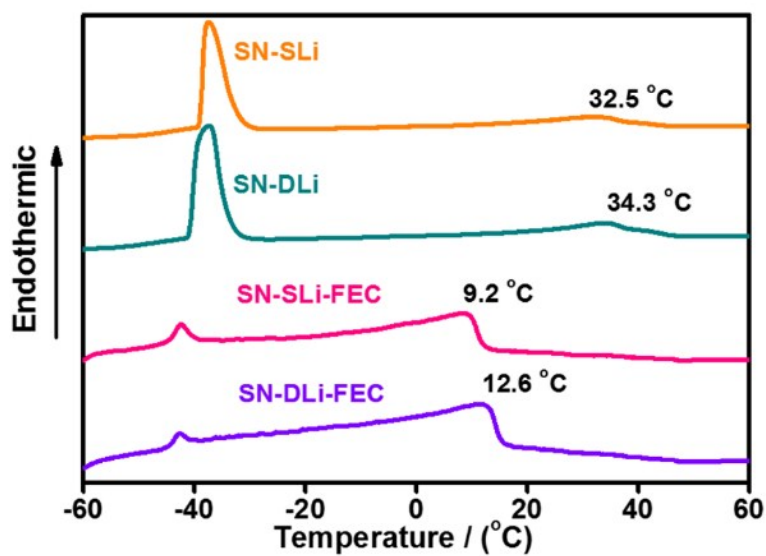

Fig. S1 DSC profiles of SN-based electrolytes.

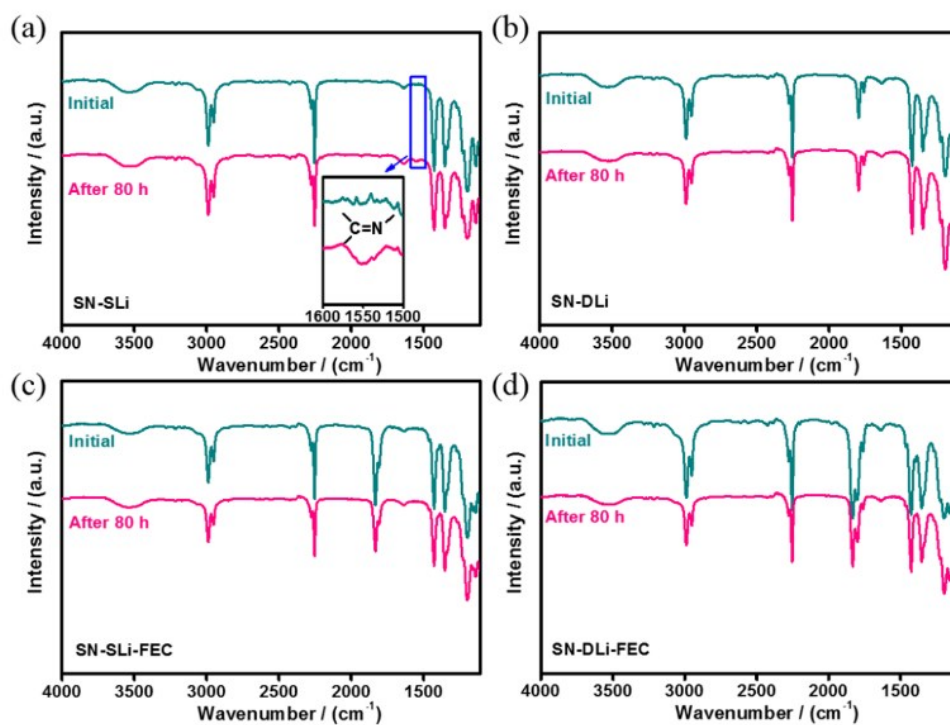

Fig. S2 FT-IR curves of (a) SN-SLi, (b) SN-DLi, (c) SN-SLi-FEC and (d) SN-DLi-FEC electrolyte solutions before and after reacting with Li-metal for 80 h at 60 °C.

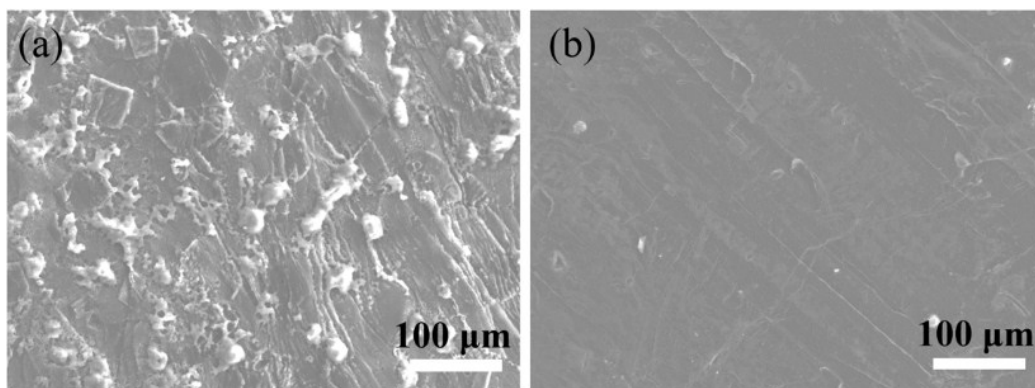

**Fig. S3** SEM images of Li-metal obtained after soaking in different single-salt SN-based electrolytes for 80 h at 60 °C: (a) SN-SLi and (b) SN-SLi-FEC.

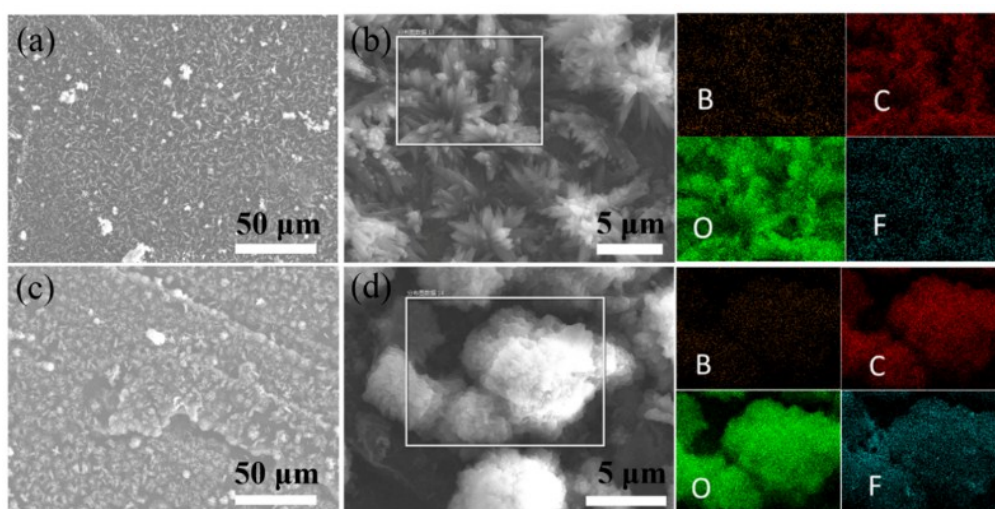

**Fig. S4** SEM and EDS maps of Li-metal obtained after soaking in SN-DLi (a, b) and SN-DLi-FEC (c, d) for 80 h at 60 °C

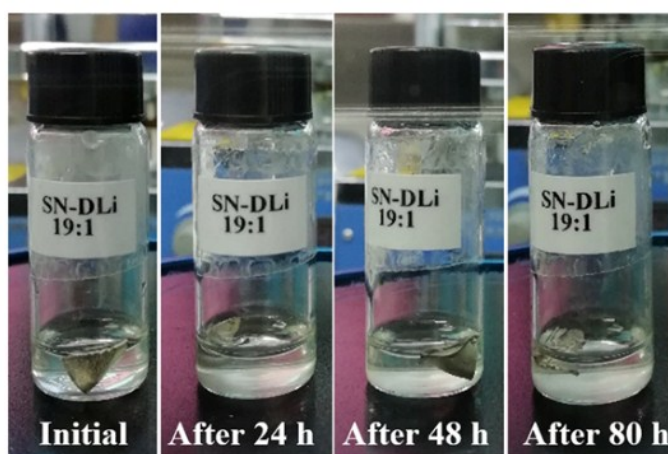

**Fig. S5** Photographs of SN-DLi 19:1 electrolyte with Li-metal for different times at 60 °C.

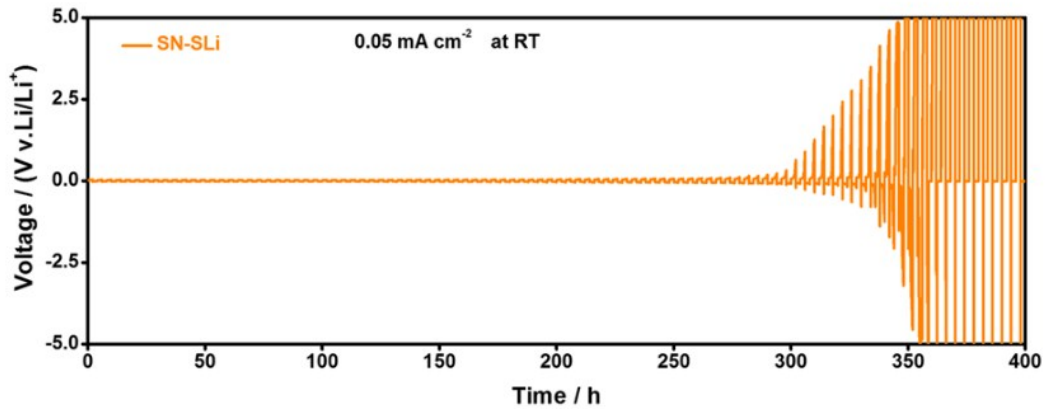

Fig. S6  $V-t$  curve of Li/SN-SLi/Li symmetric battery.

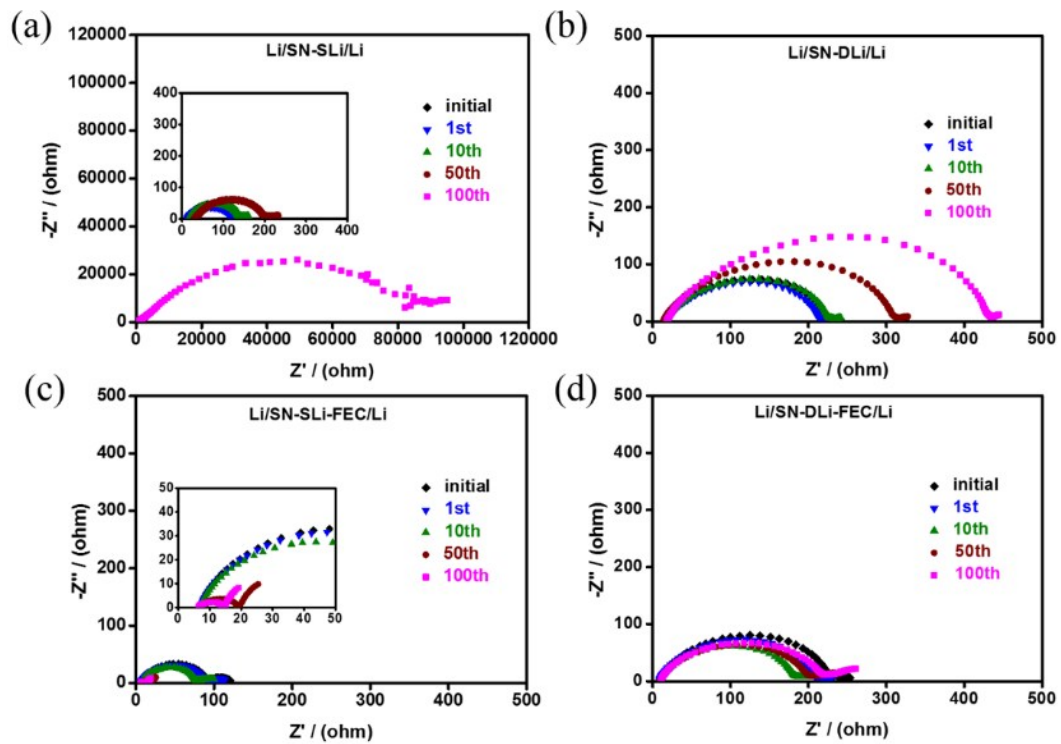

Fig. S7 AC impedance spectra of Li/Li symmetric battery with different SN-based electrolytes during cycling. (a) SN-SLi, (b) SN-DLi, (c) SN-SLi-FEC and (d) SN-DLi-FEC.

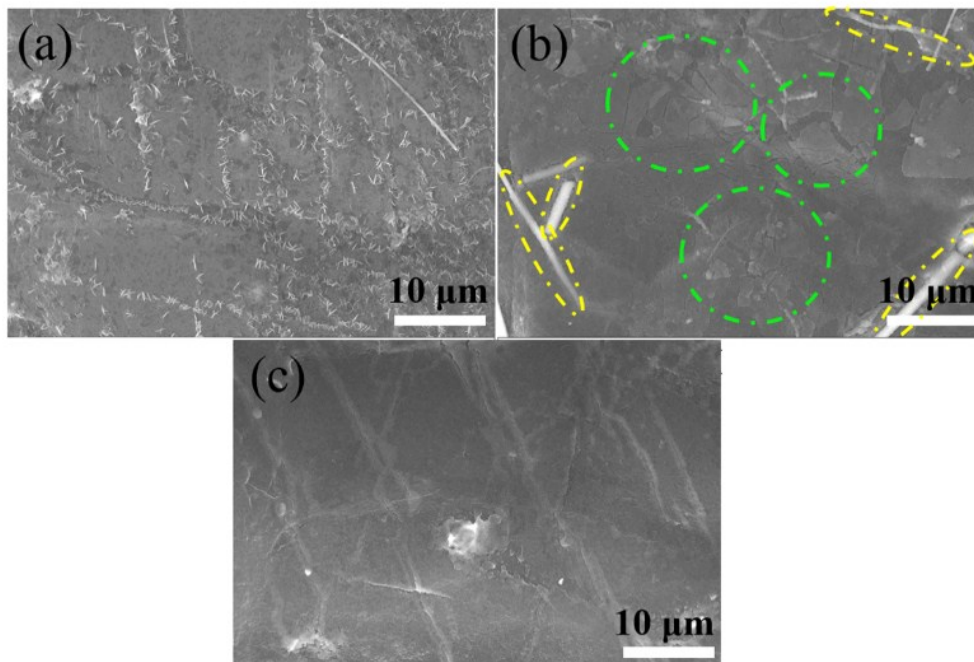

**Fig. S8** SEM images of Li-metal obtained after 100 cycles in Li/Li symmetric battery with different SN-based electrolytes. (a) SN-DLi, (b) SN-SLi-FEC and (c) SN-DLi-FEC.

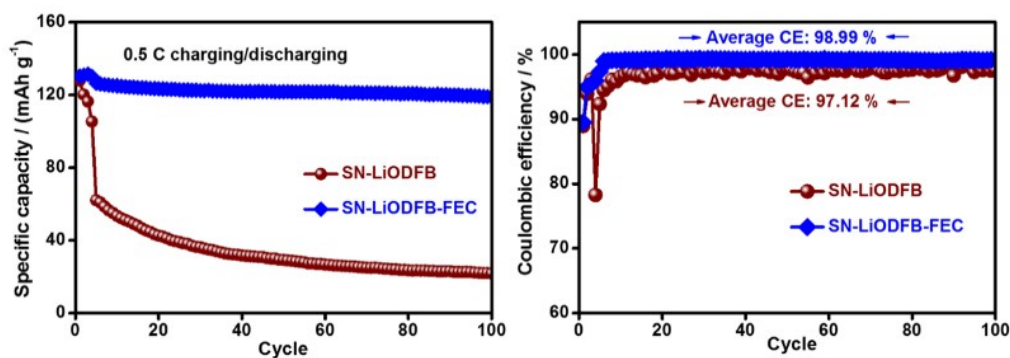

**Fig. S9** Cyclic performance and corresponding coulombic efficiency of LCO/Li batteries equipped with SN-LiODFB and SN-LiODFB-FEC.

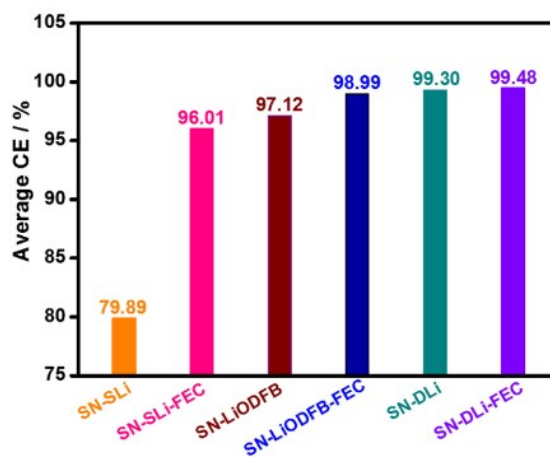

**Fig. S10** Average coulombic efficiency of LCO/Li batteries equipped with different SN-based electrolytes from 1st to 100th cycle at 0.5 C.

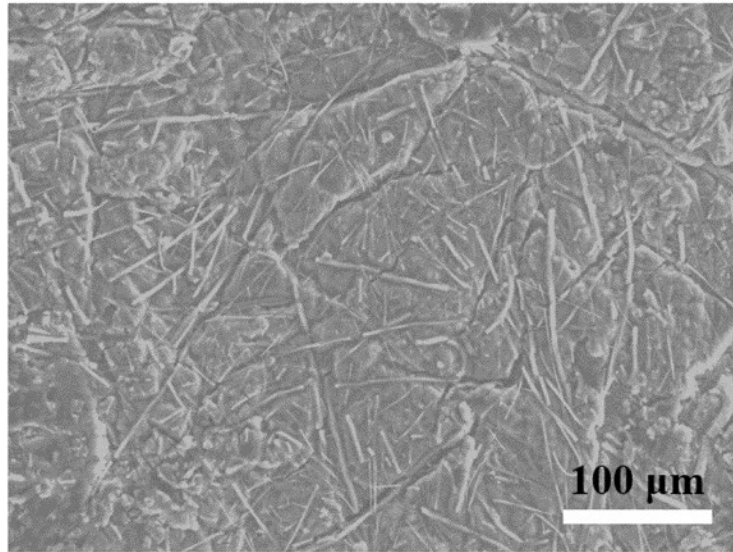

**Fig. S11** SEM image of Li-metal obtained after 100 cycles in LCO/SN-SLi-FEC/Li battery at the voltage range of 3.0-4.2 V.

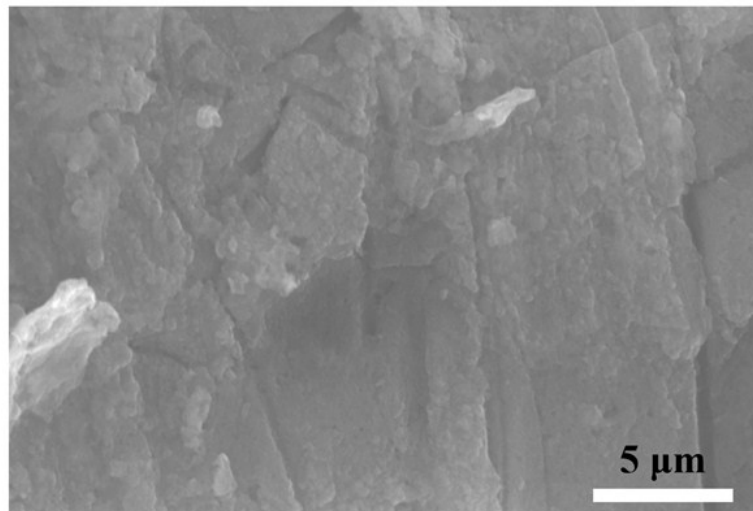

**Fig. S12** SEM image of Li-metal obtained after 100 cycles in LCO/SN-DLi-FEC/Li battery at the voltage range of 3.0-4.4 V.
